# Supplementary material for: Expanding GSK's solvent selection guide – embedding sustainability into solvent selection starting at medicinal chemistry
Source: Royal Society of Chemistry journal article supplement (doi:10.1039/c0gc00918k), 2011-01-01
Supplement: c0gc00918k.pdf [file c0gc00918k.pdf]

GSK Solvent Selection Guide 2009

| Classification         | Solvent<br><small>click on solvent name for<br/>hyperlink to more detail</small> | Cas<br>number | Melting<br>point °C | Boiling<br>Point °C | Waste | Environ-<br>mental<br>Impact | Health | Flamm-<br>ability &<br>Explosion | Reactivity/<br>Stability | Life<br>Cycle<br>Score | Legislation<br>Flag | EH&S Red<br>Flag |
|------------------------|----------------------------------------------------------------------------------|---------------|---------------------|---------------------|-------|------------------------------|--------|----------------------------------|--------------------------|------------------------|---------------------|------------------|
| Water                  | Water                                                                            | 7732-18-5     | 0                   | 100                 | 4     | 10                           | 10     | 10                               | 10                       | 10                     |                     |                  |
| Alcohol                | 2-Ethyl hexanol                                                                  | 104-76-7      | -76                 | 185                 | 9     | 5                            | 6      | 9                                | 10                       | 6                      |                     |                  |
|                        | Glycerol                                                                         | 56-81-5       | 18                  | 290                 | 6     | 7                            | 8      | 10                               | 9                        | 8                      |                     |                  |
|                        | Cyclohexanol                                                                     | 108-93-0      | 25                  | 161                 | 6     | 6                            | 7      | 9                                | 9                        | 8                      |                     |                  |
|                        | Ethylene glycol                                                                  | 107-21-1      | -13                 | 197                 | 5     | 8                            | 7      | 10                               | 9                        | 9                      |                     |                  |
|                        | 1,4-butanediol                                                                   | 110-63-4      | 20                  | 235                 | 6     | 6                            | 8      | 10                               | 10                       | 4                      |                     |                  |
|                        | Isoamyl alcohol                                                                  | 123-51-3      | -117                | 131                 | 6     | 6                            | 7      | 9                                | 10                       | 6                      |                     |                  |
|                        | 1,2-propanediol                                                                  | 57-55-6       | -60                 | 188                 | 6     | 6                            | 10     | 10                               | 10                       | 3                      |                     |                  |
|                        | 1,3-propanediol                                                                  | 504-63-2      | -27                 | 214                 | 6     | 6                            | 9      | 10                               | 10                       | 3                      |                     |                  |
|                        | Benzyl alcohol                                                                   | 100-51-6      | -15                 | 205                 | 6     | 6                            | 7      | 10                               | 7                        | 6                      |                     |                  |
|                        | 2-Pentanol                                                                       | 6032-29-7     | -50                 | 119                 | 6     | 6                            | 6      | 8                                | 8                        | 6                      |                     |                  |
|                        | 1-Butanol                                                                        | 71-36-3       | -89                 | 118                 | 5     | 7                            | 5      | 8                                | 9                        | 5                      |                     |                  |
|                        | 2-Butanol                                                                        | 78-92-2       | -115                | 100                 | 4     | 6                            | 8      | 7                                | 9                        | 6                      |                     |                  |
|                        | Ethanol IMS                                                                      | 64-17-5       | -114                | 78                  | 3     | 8                            | 8      | 6                                | 9                        | 9                      |                     |                  |
|                        | t-Butanol                                                                        | 75-65-0       | 25                  | 82                  | 3     | 9                            | 6      | 6                                | 10                       | 8                      |                     |                  |
|                        | Methanol                                                                         | 67-56-1       | -98                 | 65                  | 4     | 9                            | 5      | 5                                | 10                       | 9                      |                     |                  |
|                        | 2-Propanol                                                                       | 67-63-0       | -88                 | 82                  | 3     | 9                            | 8      | 6                                | 8                        | 4                      |                     |                  |
|                        | 1-Propanol                                                                       | 71-23-8       | -127                | 97                  | 4     | 7                            | 5      | 7                                | 10                       | 7                      |                     |                  |
| 2-Methoxyethanol       | 109-86-4                                                                         | -85           | 124                 | 3                   | 8     | 2                            | 7      | 6                                | 7                        |                        |                     |                  |
| Ester                  | t-Butyl acetate                                                                  | 540-88-5      | -78                 | 95                  | 6     | 9                            | 8      | 6                                | 10                       | 8                      |                     |                  |
|                        | n-octyl acetate                                                                  | 112-14-1      | -39                 | 210                 | 9     | 5                            | 5      | 8                                | 10                       | 6                      |                     |                  |
|                        | Butyl acetate                                                                    | 123-86-4      | -77                 | 126                 | 7     | 7                            | 8      | 8                                | 10                       | 5                      |                     |                  |
|                        | Ethylene carbonate                                                               | 96-49-1       | 36                  | 248                 | 6     | 7                            | 5      | 10                               | 9                        |                        |                     |                  |
|                        | Propylene carbonate                                                              | 108-32-7      | -55                 | 242                 | 6     | 7                            | 5      | 8                                | 9                        |                        |                     |                  |
|                        | Isopropyl acetate                                                                | 108-21-4      | -73                 | 89                  | 5     | 7                            | 7      | 6                                | 9                        | 7                      |                     |                  |
|                        | Ethyl lactate                                                                    | 97-64-3       | -23                 | 154                 | 7     | 5                            | 4      | 8                                | 10                       |                        |                     |                  |
|                        | Propyl acetate                                                                   | 109-60-4      | -92                 | 102                 | 5     | 7                            | 8      | 6                                | 10                       | 4                      |                     |                  |
|                        | Dimethyl carbonate                                                               | 616-38-6      | -1                  | 91                  | 4     | 8                            | 7      | 6                                | 10                       | 8                      |                     |                  |
|                        | methyl lactate                                                                   | 547-64-8      | -66                 | 144                 | 5     | 9                            | 4      | 8                                | 9                        | 5                      |                     |                  |
|                        | Ethyl acetate                                                                    | 141-78-6      | -84                 | 77                  | 4     | 8                            | 8      | 4                                | 8                        | 6                      |                     |                  |
|                        | Ethyl propionate                                                                 | 105-37-3      | -74                 | 99                  | 5     | 7                            | 4      | 6                                | 6                        |                        |                     |                  |
|                        | Methyl acetate                                                                   | 79-20-9       | -98                 | 57                  | 3     | 9                            | 7      | 4                                | 9                        | 7                      |                     |                  |
| Ethyl formate          | 109-94-4                                                                         | -80           | 54                  | 4                   | 6     | 5                            | 4      | 9                                |                          |                        |                     |                  |
| Ketone                 | Cyclohexanone                                                                    | 108-94-1      | -32                 | 155                 | 6     | 8                            | 6      | 8                                | 9                        | 6                      |                     |                  |
|                        | Cyclopentanone                                                                   | 120-92-3      | -51                 | 131                 | 7     | 6                            | 6      | 8                                | 10                       | 6                      |                     |                  |
|                        | 2-Pentanone                                                                      | 107-87-9      | -78                 | 102                 | 5     | 6                            | 6      | 7                                | 10                       | 4                      |                     |                  |
|                        | 3-Pentanone                                                                      | 96-22-0       | -42                 | 102                 | 5     | 6                            | 8      | 7                                | 6                        | 4                      |                     |                  |
|                        | Methylisobutyl ketone                                                            | 108-10-1      | -84                 | 117                 | 6     | 6                            | 6      | 7                                | 8                        | 2                      |                     |                  |
| Acid                   | Acetone                                                                          | 67-64-1       | -95                 | 56                  | 3     | 9                            | 8      | 4                                | 8                        | 7                      |                     |                  |
|                        | Methyl ethyl ketone                                                              | 78-93-3       | -87                 | 80                  | 3     | 7                            | 8      | 4                                | 8                        | 3                      |                     |                  |
|                        | Propionic acid                                                                   | 79-09-4       | -21                 | 141                 | 4     | 8                            | 6      | 8                                | 8                        | 7                      |                     |                  |
| Aromatic               | acetic anhydride                                                                 | 108-24-7      | -73                 | 140                 | 5     | 8                            | 4      | 8                                | 6                        | 6                      |                     |                  |
|                        | Acetic acid                                                                      | 64-19-7       | 17                  | 118                 | 4     | 8                            | 6      | 8                                | 7                        | 8                      |                     |                  |
| Hydrocarbon            | Mesitylene                                                                       | 108-67-8      | -45                 | 165                 | 8     | 3                            | 7      | 6                                | 10                       | 7                      |                     |                  |
|                        | Cumene                                                                           | 98-82-8       | -96                 | 152                 | 7     | 5                            | 6      | 8                                | 5                        | 7                      |                     |                  |
|                        | p-Xylene                                                                         | 106-42-3      | -13                 | 138                 | 7     | 2                            | 6      | 5                                | 10                       | 7                      |                     |                  |
|                        | Toluene                                                                          | 108-88-3      | -95                 | 111                 | 6     | 3                            | 4      | 4                                | 10                       | 7                      |                     |                  |
|                        | Benzene                                                                          | 71-43-2       | 6                   | 80                  | 5     | 6                            | 1      | 3                                | 10                       | 7                      |                     |                  |
| Ether                  | cis-Decalin                                                                      | 493-01-6      | -43                 | 196                 | 7     | 3                            | 7      | 6                                | 7                        | 7                      |                     |                  |
|                        | ISOPAR G                                                                         | 64742-48-9    | -60                 | 163                 | 8     | 2                            | 9      | 6                                | 10                       |                        |                     |                  |
|                        | Isooctane                                                                        | 540-84-1      | -107                | 99                  | 6     | 4                            | 8      | 3                                | 10                       | 7                      |                     |                  |
|                        | Methyl cyclohexane                                                               | 108-87-2      | -127                | 101                 | 6     | 5                            | 8      | 3                                | 10                       | 7                      |                     |                  |
|                        | Cyclohexane                                                                      | 110-82-7      | 7                   | 81                  | 5     | 5                            | 7      | 2                                | 10                       | 7                      |                     |                  |
|                        | Heptane                                                                          | 142-82-5      | -91                 | 98                  | 6     | 3                            | 8      | 3                                | 10                       | 7                      |                     |                  |
|                        | Pentane                                                                          | 109-66-0      | -130                | 36                  | 5     | 6                            | 8      | 2                                | 10                       | 7                      |                     |                  |
|                        | Methylcyclopentane                                                               | 96-37-7       | -142                | 72                  | 6     | 4                            | 5      | 2                                | 9                        | 7                      |                     |                  |
|                        | 2-Methylpentane                                                                  | 107-83-5      | -153                | 60                  | 5     | 4                            | 7      | 2                                | 10                       | 7                      |                     |                  |
|                        | Hexane                                                                           | 110-54-3      | -95                 | 69                  | 5     | 3                            | 4      | 2                                | 10                       | 7                      |                     |                  |
| Ether                  | Petroleum spirit                                                                 | 8032-32-4     | -73                 | 55                  | 6     | 2                            | 2      | 3                                | 10                       | 7                      |                     |                  |
|                        | Di(ethylene glycol)                                                              | 111-46-6      | -10                 | 246                 | 6     | 8                            | 7      | 9                                | 9                        | 8                      |                     |                  |
|                        | Ethoxybenzene                                                                    | 103-73-1      | -29                 | 170                 | 8     | 4                            | 7      | 10                               | 10                       |                        |                     |                  |
|                        | Tri(ethylene glycol)                                                             | 112-27-6      | -7                  | 285                 | 6     | 8                            | 6      | 10                               | 9                        | 7                      |                     |                  |
|                        | Sulfolane                                                                        | 126-33-0      | 28                  | 282                 | 5     | 9                            | 6      | 10                               | 10                       |                        |                     |                  |
|                        | DEG monobutyl ether                                                              | 112-34-5      | -68                 | 231                 | 6     | 7                            | 7      | 9                                | 6                        | 7                      |                     |                  |
|                        | Anisole                                                                          | 100-66-3      | -38                 | 154                 | 6     | 6                            | 7      | 7                                | 6                        | 5                      |                     |                  |
|                        | Diphenyl ether                                                                   | 101-84-8      | 27                  | 258                 | 8     | 5                            | 4      | 8                                | 6                        |                        |                     |                  |
|                        | Dibutyl ether                                                                    | 142-96-1      | -95                 | 140                 | 7     | 7                            | 4      | 5                                | 5                        | 4                      |                     |                  |
|                        | t-Amyl methyl ether                                                              | 994-05-8      | -80                 | 86                  | 5     | 5                            | 5      | 5                                | 9                        | 8                      |                     |                  |
|                        | t-Butylmethyl ether                                                              | 1634-04-4     | -109                | 55                  | 4     | 5                            | 5      | 3                                | 9                        | 8                      |                     |                  |
|                        | Cyclopentyl methyl ether                                                         | 5614-37-9     | -140                | 106                 | 6     | 4                            | 4      | 5                                | 8                        | 4                      |                     |                  |
|                        | t-Butyl ethyl ether                                                              | 637-92-3      | -74                 | 70                  | 5     | 5                            | 4      | 4                                | 9                        | 8                      |                     |                  |
|                        | 2-Methyltetrahydrofuran                                                          | 96-47-9       | -137                | 78                  | 4     | 5                            | 4      | 3                                | 6                        | 4                      |                     |                  |
|                        | Diethyl ether                                                                    | 60-29-7       | -116                | 35                  | 4     | 4                            | 5      | 2                                | 4                        | 6                      |                     |                  |
|                        | Bis(2-methoxyethyl) ether                                                        | 111-96-6      | -68                 | 162                 | 4     | 5                            | 2      | 8                                | 4                        | 6                      |                     |                  |
|                        | Dimethyl ether                                                                   | 115-10-6      | -141                | -25                 | 3     | 5                            | 7      | 1                                | 4                        | 7                      |                     |                  |
| 1,4-Dioxane            | 123-91-1                                                                         | 12            | 102                 | 3                   | 4     | 4                            | 4      | 5                                | 6                        |                        |                     |                  |
| Tetrahydrofuran        | 109-99-9                                                                         | -108          | 65                  | 3                   | 5     | 6                            | 3      | 4                                | 4                        |                        |                     |                  |
| 1,2-Dimethoxyethane    | 110-71-4                                                                         | -58           | 85                  | 4                   | 5     | 2                            | 4      | 4                                | 7                        |                        |                     |                  |
| Diisopropyl ether      | 108-20-3                                                                         | -86           | 68                  | 4                   | 3     | 8                            | 1      | 1                                | 9                        |                        |                     |                  |
| Dipolar aprotic        | Dimethylpropylene urea                                                           | 7226-23-5     | -23                 | 247                 | 7     | 7                            | 4      | 9                                | 7                        | 3                      |                     |                  |
|                        | Dimethyl sulfoxide                                                               | 67-68-5       | 19                  | 189                 | 5     | 5                            | 7      | 9                                | 2                        | 6                      |                     |                  |
|                        | Formamide                                                                        | 75-12-7       | 3                   | 220                 | 4     | 7                            | 2      | 10                               | 8                        | 8                      |                     |                  |
|                        | Dimethyl formamide                                                               | 68-12-2       | -61                 | 153                 | 4     | 6                            | 2      | 9                                | 9                        | 7                      |                     |                  |
|                        | N-Methylformamide                                                                | 123-39-7      | -4                  | 200                 | 4     | 6                            | 2      | 10                               | 10                       | 7                      |                     |                  |
|                        | N-Methyl pyrrolidone                                                             | 872-50-4      | -24                 | 202                 | 5     | 6                            | 3      | 9                                | 8                        | 4                      |                     |                  |
|                        | Propanenitrile                                                                   | 107-12-0      | -93                 | 97                  | 3     | 6                            | 4      | 6                                | 9                        |                        |                     |                  |
|                        | Dimethyl acetamide                                                               | 127-19-5      | -20                 | 165                 | 5     | 6                            | 2      | 10                               | 8                        | 2                      |                     |                  |
| Halogenated            | Acetonitrile                                                                     | 75-05-8       | -45                 | 82                  | 2     | 6                            | 6      | 6                                | 10                       | 3                      |                     |                  |
|                        | 1,2-Dichlorobenzene                                                              | 95-50-1       | -17                 | 180                 | 7     | 4                            | 6      | 10                               | 9                        | 8                      |                     |                  |
|                        | 1,2,4-Trichlorobenzene                                                           | 120-82-1      | 17                  | 214                 | 7     | 4                            | 4      | 9                                | 10                       | 8                      |                     |                  |
|                        | Chlorobenzene                                                                    | 108-90-7      | -45                 | 132                 | 6     | 6                            | 4      | 8                                | 10                       | 8                      |                     |                  |
|                        | trichloroacetonitrile                                                            | 545-06-2      | -42                 | 83                  | 5     | 6                            | 6      | 7                                | 10                       |                        |                     |                  |
|                        | Chloroacetic acid                                                                | 79-11-8       | 61                  | 189                 | 4     | 6                            | 6      | 10                               | 8                        | 7                      |                     |                  |
|                        | trichloroacetic acid                                                             | 76-03-9       | 58                  | 197                 | 3     | 6                            | 6      | 10                               | 6                        | 7                      |                     |                  |
|                        | Perfluorotoluene                                                                 | 434-64-0      | -66                 | 104                 | 5     | 3                            | 4      | 5                                | 10                       |                        |                     |                  |
|                        | Perfluorocyclohexane                                                             | 355-68-0      | 51                  | 53                  | 5     | 5                            | 3      | 5                                | 10                       |                        |                     |                  |
|                        | Carbon tetrachloride                                                             | 56-23-5       | -23                 | 77                  | 4     | 5                            | 3      | 4                                | 10                       | 7                      |                     |                  |
|                        | Dichloromethane                                                                  | 75-09-2       | -95                 | 40                  | 3     | 6                            | 4      | 6                                | 9                        | 7                      |                     |                  |
|                        | Perfluorohexane                                                                  | 355-42-0      | -86                 | 57                  | 4     | 4                            | 3      | 5                                | 10                       |                        |                     |                  |
|                        | Fluorobenzene                                                                    | 462-06-6      | -42                 | 85                  | 5     | 3                            | 6      | 5                                | 9                        | 1                      |                     |                  |
|                        | Chloroform                                                                       | 67-66-3       | -64                 | 61                  | 3     | 6                            | 3      | 6                                | 9                        | 6                      |                     |                  |
|                        | Perfluorocyclic ether                                                            | 335-36-4      | -88                 | 103                 | 5     | 2                            | 3      | 7                                | 10                       |                        |                     |                  |
|                        | Trifluoroacetic acid                                                             | 76-05-1       | -15                 | 72                  | 2     | 5                            | 6      | 7                                | 8                        |                        |                     |                  |
|                        | Trifluorotoluene                                                                 | 98-08-8       | -29                 | 102                 | 5     | 4                            | 1      | 5                                | 9                        |                        |                     |                  |
| 1,2-Dichloroethane     | 107-06-2                                                                         | -36           | 84                  | 4                   | 4     | 2                            | 6      | 10                               | 7                        |                        |                     |                  |
| 2,2,2-Trifluoroethanol | 75-89-8                                                                          | -43           | 74                  | 3                   | 5     | 2                            | 6      | 9                                | 7                        |                        |                     |                  |
| Base                   | N,N-Dimethylaniline                                                              | 121-69-7      | 3                   | 194                 | 7     | 5                            | 4      | 8                                | 8                        | 3                      |                     |                  |
|                        | Triethylamine                                                                    | 121-44-8      | -15                 | 89                  | 4     | 5                            | 3      | 4                                | 8                        | 7                      |                     |                  |
|                        | Pyridine                                                                         | 110-86-1      | -42                 | 115                 | 3     | 4                            | 4      | 7                                | 9                        | 2                      |                     |                  |
| Other                  | Nitromethane                                                                     | 75-52-5       | -29                 | 101                 | 3     | 8                            | 4      | 7                                | 2                        |                        |                     |                  |
|                        | carbon disulfide                                                                 | 75-15-0       | -111                | 46                  | 4     | 6                            | 2      | 1                                | 6                        | 8                      |                     |                  |

Legislation Flag

|                                                                                     |                                                                                                           |
|-------------------------------------------------------------------------------------|-----------------------------------------------------------------------------------------------------------|
|  | Substitution recommended - There are no current restrictions but future regulatory restrictions may apply |
|  | Substitution recommended - existing regulatory restrictions apply                                         |
|  | Must be substituted - A regulatory ban applies                                                            |

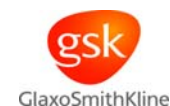

## GSK Solvent Selection Guide 2009

| Classification    | Solvent                   | CAS number | Melting point °C | Boiling point °C | Waste recycling, incineration, VOC, and biotreatment issues | Environmental Impact fate and effects on the environment | Health acute and chronic effects on human health and exposure potential | Flammability & Explosion storage and handling | Reactivity/ Stability factors affecting the stability of the solvent | Life Cycle Score Environmental Impacts to produce the solvent | Legislation Flag alerts regulatory restrictions |
|-------------------|---------------------------|------------|------------------|------------------|-------------------------------------------------------------|----------------------------------------------------------|-------------------------------------------------------------------------|-----------------------------------------------|----------------------------------------------------------------------|---------------------------------------------------------------|-------------------------------------------------|
| Greenest          | Water                     | 7732-18-5  | 0                | 100              | 4                                                           | 10                                                       | 10                                                                      | 10                                            | 10                                                                   | 10                                                            |                                                 |
| Alcohols          | 1-Butanol                 | 71-36-3    | -89              | 118              | 5                                                           | 7                                                        | 5                                                                       | 8                                             | 9                                                                    | 5                                                             |                                                 |
|                   | 2-Butanol                 | 78-92-2    | -115             | 100              | 4                                                           | 6                                                        | 8                                                                       | 7                                             | 9                                                                    | 6                                                             |                                                 |
|                   | Ethanol/IMS               | 64-17-5    | -114             | 78               | 3                                                           | 8                                                        | 8                                                                       | 6                                             | 9                                                                    | 9                                                             |                                                 |
|                   | t-Butanol                 | 75-65-0    | 25               | 82               | 3                                                           | 9                                                        | 6                                                                       | 6                                             | 10                                                                   | 8                                                             |                                                 |
|                   | Methanol                  | 67-56-1    | -98              | 65               | 4                                                           | 9                                                        | 5                                                                       | 5                                             | 10                                                                   | 9                                                             |                                                 |
|                   | 2-Propanol                | 67-63-0    | -88              | 82               | 3                                                           | 9                                                        | 8                                                                       | 6                                             | 8                                                                    | 4                                                             |                                                 |
|                   | 1-Propanol                | 71-23-8    | -127             | 97               | 4                                                           | 7                                                        | 5                                                                       | 7                                             | 10                                                                   | 7                                                             |                                                 |
|                   | 2-Methoxyethanol          | 109-86-4   | -85              | 124              | 3                                                           | 8                                                        | 2                                                                       | 7                                             | 6                                                                    | 7                                                             |                                                 |
| Ester             | t-Butyl acetate           | 540-88-5   | -78              | 95               | 6                                                           | 9                                                        | 8                                                                       | 6                                             | 10                                                                   | 8                                                             |                                                 |
|                   | Isopropyl acetate         | 108-21-4   | -73              | 89               | 5                                                           | 7                                                        | 7                                                                       | 6                                             | 9                                                                    | 7                                                             |                                                 |
|                   | Propyl acetate            | 109-60-4   | -92              | 102              | 5                                                           | 7                                                        | 8                                                                       | 6                                             | 10                                                                   | 4                                                             |                                                 |
|                   | Dimethyl carbonate        | 616-38-6   | -1               | 91               | 4                                                           | 8                                                        | 7                                                                       | 6                                             | 10                                                                   | 8                                                             |                                                 |
|                   | Ethyl acetate             | 141-78-6   | -84              | 77               | 4                                                           | 8                                                        | 8                                                                       | 4                                             | 8                                                                    | 6                                                             |                                                 |
|                   | Methyl acetate            | 79-20-9    | -98              | 57               | 3                                                           | 9                                                        | 7                                                                       | 4                                             | 9                                                                    | 7                                                             |                                                 |
| Ketone            | Methylisobutyl ketone     | 108-10-1   | -84              | 117              | 6                                                           | 6                                                        | 6                                                                       | 7                                             | 8                                                                    | 2                                                             |                                                 |
|                   | Acetone                   | 67-64-1    | -95              | 56               | 3                                                           | 9                                                        | 8                                                                       | 4                                             | 9                                                                    | 7                                                             |                                                 |
|                   | Methylethyl ketone        | 78-93-3    | -87              | 80               | 3                                                           | 7                                                        | 8                                                                       | 4                                             | 8                                                                    | 3                                                             |                                                 |
| Organic Acids     | Propionic acid            | 79-09-4    | -21              | 141              | 4                                                           | 8                                                        | 6                                                                       | 8                                             | 8                                                                    | 7                                                             |                                                 |
|                   | Acetic acid (glacial)     | 64-19-7    | 17               | 118              | 4                                                           | 8                                                        | 6                                                                       | 8                                             | 7                                                                    | 8                                                             |                                                 |
| Aromatics         | p-Xylene                  | 106-42-3   | -13              | 138              | 7                                                           | 2                                                        | 6                                                                       | 5                                             | 10                                                                   | 7                                                             |                                                 |
|                   | Toluene                   | 108-88-3   | -95              | 111              | 6                                                           | 3                                                        | 4                                                                       | 4                                             | 10                                                                   | 7                                                             |                                                 |
|                   | Benzene                   | 71-43-2    | 6                | 80               | 5                                                           | 6                                                        | 1                                                                       | 3                                             | 10                                                                   | 7                                                             |                                                 |
| Hydrocarbons      | Isooctane                 | 540-84-1   | -107             | 99               | 6                                                           | 4                                                        | 8                                                                       | 3                                             | 10                                                                   | 7                                                             |                                                 |
|                   | Cyclohexane               | 110-82-7   | 7                | 81               | 5                                                           | 5                                                        | 7                                                                       | 2                                             | 10                                                                   | 7                                                             |                                                 |
|                   | Heptane                   | 142-82-5   | -91              | 98               | 6                                                           | 3                                                        | 8                                                                       | 3                                             | 10                                                                   | 7                                                             |                                                 |
|                   | 2-Methylpentane           | 107-83-5   | -153             | 60               | 5                                                           | 4                                                        | 7                                                                       | 2                                             | 10                                                                   | 7                                                             |                                                 |
|                   | Hexane                    | 110-54-3   | -95              | 69               | 5                                                           | 3                                                        | 4                                                                       | 2                                             | 10                                                                   | 7                                                             |                                                 |
|                   | Petroleum spirit          | 8032-32-4  | -73              | 55               | 6                                                           | 2                                                        | 2                                                                       | 3                                             | 10                                                                   | 7                                                             |                                                 |
| Ethers            | t-Butyl methyl ether      | 1634-04-4  | -109             | 55               | 4                                                           | 5                                                        | 5                                                                       | 3                                             | 9                                                                    | 8                                                             |                                                 |
|                   | Cyclopentyl methyl ether  | 5614-37-9  | -140             | 106              | 6                                                           | 4                                                        | 4                                                                       | 5                                             | 8                                                                    | 4                                                             |                                                 |
|                   | 2-Methyl THF              | 96-47-9    | -137             | 78               | 4                                                           | 5                                                        | 4                                                                       | 3                                             | 6                                                                    | 4                                                             |                                                 |
|                   | Diethyl ether             | 60-29-7    | -116             | 35               | 4                                                           | 4                                                        | 5                                                                       | 2                                             | 4                                                                    | 6                                                             |                                                 |
|                   | Bis(2-methoxyethyl) ether | 111-96-6   | -68              | 162              | 4                                                           | 5                                                        | 2                                                                       | 8                                             | 4                                                                    | 6                                                             |                                                 |
|                   | 1,4-Dioxane               | 123-91-1   | 12               | 102              | 3                                                           | 4                                                        | 4                                                                       | 4                                             | 5                                                                    | 6                                                             |                                                 |
|                   | Tetrahydrofuran           | 109-99-9   | -108             | 65               | 3                                                           | 5                                                        | 6                                                                       | 3                                             | 4                                                                    | 4                                                             |                                                 |
|                   | 1,2-Dimethoxyethane       | 110-71-4   | -58              | 85               | 4                                                           | 5                                                        | 2                                                                       | 4                                             | 4                                                                    | 7                                                             |                                                 |
| Diisopropyl ether | 108-20-3                  | -86        | 68               | 4                | 3                                                           | 8                                                        | 1                                                                       | 1                                             | 9                                                                    |                                                               |                                                 |
| Dipolar aprotics  | Dimethyl sulfoxide        | 67-68-5    | 19               | 189              | 5                                                           | 5                                                        | 7                                                                       | 9                                             | 2                                                                    | 6                                                             |                                                 |
|                   | Dimethyl formamide        | 68-12-2    | -61              | 153              | 4                                                           | 6                                                        | 2                                                                       | 9                                             | 9                                                                    | 7                                                             |                                                 |
|                   | N-Methylformamide         | 123-39-7   | -4               | 200              | 4                                                           | 6                                                        | 2                                                                       | 10                                            | 10                                                                   | 7                                                             |                                                 |
|                   | N-Methyl pyrrolidone      | 872-50-4   | -24              | 202              | 5                                                           | 6                                                        | 3                                                                       | 9                                             | 8                                                                    | 4                                                             |                                                 |
|                   | Dimethyl acetamide        | 127-19-5   | -20              | 165              | 5                                                           | 6                                                        | 2                                                                       | 10                                            | 8                                                                    | 2                                                             |                                                 |
|                   | Acetonitrile              | 75-05-8    | -45              | 82               | 2                                                           | 6                                                        | 6                                                                       | 6                                             | 10                                                                   | 3                                                             |                                                 |
| Chlorinated       | Carbon tetrachloride      | 56-23-5    | -23              | 77               | 4                                                           | 5                                                        | 3                                                                       | 4                                             | 10                                                                   | 7                                                             |                                                 |
|                   | Dichloromethane           | 75-09-2    | -95              | 40               | 3                                                           | 6                                                        | 4                                                                       | 6                                             | 9                                                                    | 7                                                             |                                                 |
|                   | Chloroform                | 67-66-3    | -64              | 61               | 3                                                           | 6                                                        | 3                                                                       | 6                                             | 9                                                                    | 6                                                             |                                                 |
|                   | 1,2-Dichloroethane        | 107-06-2   | -36              | 84               | 4                                                           | 4                                                        | 2                                                                       | 6                                             | 10                                                                   | 7                                                             |                                                 |

| Legislation Flag |                                                                                                           |
|------------------|-----------------------------------------------------------------------------------------------------------|
|                  | Substitution recommended - There are no current restrictions but future regulatory restrictions may apply |
|                  | Substitution recommended - existing regulatory restrictions apply                                         |
|                  | Must be substituted - A regulatory ban applies                                                            |

# GSK Solvent Selection Guide

|                  | Few issues (bp°C)                                                                                                                                         | Some issues (bp°C)                                                                     | Major issues                                                                                                       |
|------------------|-----------------------------------------------------------------------------------------------------------------------------------------------------------|----------------------------------------------------------------------------------------|--------------------------------------------------------------------------------------------------------------------|
| Chlorinated      | <p>....before using chlorinated solvents, have you considered<br/> <b>TBME, isopropyl acetate, ethyl acetate, 2-Methyl THF or Dimethyl Carbonate?</b></p> |                                                                                        | Dichloromethane **<br>Carbon tetrachloride **<br>Chloroform **<br>1,2-Dichloroethane **                            |
| Greenest Option  | Water (100°C)                                                                                                                                             |                                                                                        |                                                                                                                    |
| Alcohols         | 1-Butanol (118°C)<br>2-Butanol (100°C)                                                                                                                    | Ethanol/IMS (78°C)<br>t-Butanol (82°C)                                                 | 2-Methoxyethanol **                                                                                                |
| Esters           | t-Butyl acetate (95°C)<br>Isopropyl acetate (89°C)<br>Propyl acetate (102°C)<br>Dimethyl Carbonate (91°C)                                                 | Methanol (65°C)<br>Ethyl acetate (77°C)<br>Methyl acetate (57°C)                       |                                                                                                                    |
| Ketones          |                                                                                                                                                           | Methyl isobutyl ketone (117°C)<br>Acetone (56°C)                                       | Methyl ethyl ketone                                                                                                |
| Aromatics        |                                                                                                                                                           | p-Xylene (138°C)<br>Toluene ** (111°C)                                                 | Benzene **                                                                                                         |
| Hydrocarbons     |                                                                                                                                                           | Isooctane (99°C)<br>Cyclohexane (81°C)<br>Heptane (98°C)                               | Petroleum spirit **<br>2-Methylpentane<br>Hexane                                                                   |
| Ethers           |                                                                                                                                                           | t-Butyl methyl ether (55°C)<br>2-Methyl THF (78°C)<br>Cyclopentyl methyl ether (106°C) | 1,4-Dioxane **<br>1,2-Dimethoxyethane **<br>Tetrahydrofuran<br>Diethyl ether<br>Diisopropyl ether **               |
| Dipolar aprotics |                                                                                                                                                           | Dimethyl sulfoxide (189°C)                                                             | Dimethyl formamide **<br>N-Methyl pyrrolidone **<br>N-Methyl formamide **<br>Dimethyl acetamide **<br>Acetonitrile |

\*\* = EHS Regulatory Alerts: please consult the detailed solvent guide and the GSK Chemicals Legislation Guide for more information
